# Supplementary material for: A new smog chamber system for atmospheric multiphase chemistry study: design and characterization
Source: Copernicus journal article supplement (doi:10.5194/amt-2023-34), 2023-04-18
Supplement: Supplementary file 1 [file amt-2023-34-supplement.pdf]

1 Supporting Information:

2

3 **A new smog chamber system for atmospheric multiphase**  
4 **chemistry study: design and characterization**

5 Taomou Zong<sup>1</sup>, Zhijun Wu<sup>1,2,\*</sup>, Junrui Wang<sup>1,3</sup>, Kai Bi<sup>4</sup>, Wenxu Fang<sup>1</sup>, Yanrong Yang<sup>1</sup>,  
6 Xuena Yu<sup>1</sup>, Zhier Bao<sup>5</sup>, Xiangxinyue Meng<sup>1</sup>, Yuheng Zhang<sup>1</sup>, Song Guo<sup>1,2</sup>, Yang  
7 Chen<sup>5</sup>, Chunshan Liu<sup>6</sup>, Yue Zhang<sup>7</sup>, Shao-Meng Li<sup>1</sup>, Min Hu<sup>1,2</sup>

8 <sup>1</sup>State Key Joint Laboratory of Environmental Simulation and Pollution Control, College of  
9 Environmental Sciences and Engineering, Peking University, Beijing 100871, China

10 <sup>2</sup>Collaborative Innovation Center of Atmospheric Environment and Equipment Technology, Nanjing  
11 University of Information Science and Technology, Nanjing 210044, China

12 <sup>3</sup>Laboratory of Atmospheric Observation Supersite, School of Environment and Energy, Peking  
13 University Shenzhen Graduate School, Shenzhen 518055, China

14 <sup>4</sup>Beijing Key Laboratory of Cloud, Precipitation and Atmospheric Water Resources, Beijing, 100089,  
15 China

16 <sup>5</sup>Research Center for Atmospheric Environment, Chongqing Institute of Green and Intelligent  
17 Technology, Chinese Academy of Sciences, Chongqing, 400714, China

18 <sup>6</sup>Beijing Convenient Environmental Tech Co. Ltd., Beijing 101115, China

19 <sup>7</sup>Department of Atmospheric Sciences, Texas A&M University, College Station, TX 77843, United States

20 *Correspondence to:* Zhijun Wu ([zhijunwu@pku.edu.cn](mailto:zhijunwu@pku.edu.cn))

21

**Table S1.** Comparison of the background species concentration in this chamber system with that in other chambers

| Instrument                                            | Thermo Scientific |                 |          |                                     |                   | Picarro Inc.    |                                           | GC-MS<br>(Summa Canister) | TSI<br>CPC3772                          | Sensor in Chamber |          |
|-------------------------------------------------------|-------------------|-----------------|----------|-------------------------------------|-------------------|-----------------|-------------------------------------------|---------------------------|-----------------------------------------|-------------------|----------|
|                                                       | Model<br>43i-TLE  | Model 42i-TL    |          | Model 49i                           | Model 48i-<br>TLE | CO <sub>2</sub> | CH <sub>4</sub>                           | NMHC                      | Particles                               | T                 | RH       |
| Species                                               | SO <sub>2</sub>   | NO <sub>2</sub> | NO       | O <sub>3</sub>                      | CO                | CO <sub>2</sub> | CH <sub>4</sub>                           | NMHC                      | Particles                               | T                 | RH       |
| Indoor air                                            | ~1 ppb            | ~3 ppb          | ~6 ppb   | 1~2 ppb                             | ~500 ppb          | ~550 ppm        | ~2.5 ppm                                  | 111.79 ppb                | ~3~6*10 <sup>3</sup> # cm <sup>-3</sup> | ~25 °C            | ~30%~50% |
| Chamber_dry zero air                                  | <1 ppb            | <0.5 ppb        | <0.5 ppb | <2 ppb                              | <50 ppb           | ~27 ppm         | Below<br>instrument<br>detection<br>limit | 43.5 ppb                  | <0.5 # cm <sup>-3</sup>                 | ~25 °C            | 1~2%     |
| Chamber_wet zero<br>air_80%RH                         | <1 ppb            | <0.5 ppb        | <0.5 ppb | Below instrument<br>detection limit | <50 ppb           | ~26 ppm         |                                           | 35.448 ppb                | <2 # cm <sup>-3</sup>                   | ~25 °C            | > 80%    |
| <i>24m<sup>3</sup> Teflon (White et al., 2018)</i>    |                   | <0.5 ppb        | <0.5 ppb |                                     |                   |                 |                                           | <17 ppb                   | <10 # cm <sup>-3</sup>                  |                   |          |
| <i>7m<sup>3</sup> Teflon (Bin Babar et al., 2016)</i> |                   | <1 ppb          | <1 ppb   | <1 ppb                              |                   |                 |                                           |                           | <10 # cm <sup>-3</sup>                  |                   |          |
| <i>30m<sup>3</sup> Teflon (Wang et al., 2014)</i>     |                   | <1 ppb          | <1 ppb   | <1 ppb                              |                   |                 |                                           | <5 ppb                    | ~0 # cm <sup>-3</sup>                   |                   |          |
| <i>12m<sup>3</sup> Teflon (Platt et al., 2013)</i>    |                   |                 |          |                                     |                   | ~35 ppm         |                                           |                           | <0.1 # cm <sup>-3</sup>                 |                   |          |
| <i>90m<sup>3</sup> Teflon (Carter et al., 2005)</i>   |                   | <5 ppb          | <5 ppb   |                                     | <50 ppb           |                 |                                           |                           |                                         |                   |          |
| <i>30m<sup>3</sup> Teflon (Chen et al., 2019)</i>     | <1 ppb            |                 |          | <1 ppb                              |                   |                 |                                           |                           |                                         |                   |          |

**Table S2.** The cleaning efficiency of common gas species and particles in this chamber system

| Instrument                       | Thermo Scientific |                 |             |                |               | TSI                                  | Sensor in Chamber |        |
|----------------------------------|-------------------|-----------------|-------------|----------------|---------------|--------------------------------------|-------------------|--------|
|                                  | Model 43i-TLE     | Model 42i-TL    |             | Model 49i      | Model 48i-TLE | CPC3772                              |                   |        |
| Species                          | SO <sub>2</sub>   | NO <sub>2</sub> | NO          | O <sub>3</sub> | CO            | Particles                            | T                 | RH     |
| Initial Abundance                | 151.4ppb          | 125ppb          | 1621ppb     | 86.1ppb        | 4600ppb       | 6*10 <sup>3</sup> #·cm <sup>-3</sup> | ~25°C             | ~99%   |
| After Cleaning_5 times of Volume | <1ppb             | <0.5ppb         | 6.94ppb     | <2ppb          | 291ppb        | <0.5 #·cm <sup>-3</sup>              | ~25°C             | 1~2%   |
| Background_Dry                   | <1ppb             | <0.5ppb         | <0.5ppb     | <2ppb          | <50ppb        | <0.5 #·cm <sup>-3</sup>              | ~25°C             | 1~2%   |
| Cleaning Efficiency              | ~100%             | ~100%           | 99.60%      | ~100%          | 94.70%        | ~100%                                | /                 | ~100%  |
| Volume for Completely Cleaning   | 9999 L            | 9999 L          | 9999+5000 L | 9999 L         | 9999+4500 L   | 9999 L                               | /                 | 9999 L |

**Table S3.** Photolysis rate constants ( $s^{-1}$ ) of some species under different light schemes (have been corrected according to the  $J_{NO_2}$  value calculated by  $NO_x$  and  $O_3$  steady-state concentration)

| Light Scheme                | $J_{H_2O_2}$                            | $J_{HCHO\_M}$                           | $J_{HCHO\_R}$                           | $J_{HONO}$                              | $J_{NO_2}$                              | $J_{NO_3\_M}$                            | $J_{NO_3\_R}$                            | $J_{O(^1D)}$                            |
|-----------------------------|-----------------------------------------|-----------------------------------------|-----------------------------------------|-----------------------------------------|-----------------------------------------|------------------------------------------|------------------------------------------|-----------------------------------------|
| Dark (0*)                   | $-3.26 \times 10^{-8}$                  | $-9.48 \times 10^{-8}$                  | $-1.29 \times 10^{-7}$                  | $-1.53 \times 10^{-6}$                  | $-7.29 \times 10^{-6}$                  | $-8.63 \times 10^{-6}$                   | $-5.84 \times 10^{-5}$                   | $-1.11 \times 10^{-6}$                  |
| all (40*)                   | $7.62 \times 10^{-7}$                   | $3.63 \times 10^{-7}$                   | $1.71 \times 10^{-7}$                   | $9.71 \times 10^{-4}$                   | $4.10 \times 10^{-3}$                   | $-1.06 \times 10^{-5}$                   | $-3.27 \times 10^{-5}$                   | $4.16 \times 10^{-7}$                   |
| <b>only back/top (20*)</b>  | <b><math>3.93 \times 10^{-7}</math></b> | <b><math>1.85 \times 10^{-7}</math></b> | <b><math>7.94 \times 10^{-8}</math></b> | <b><math>5.03 \times 10^{-4}</math></b> | <b><math>2.13 \times 10^{-3}</math></b> | <b><math>-5.39 \times 10^{-6}</math></b> | <b><math>-1.74 \times 10^{-5}</math></b> | <b><math>9.11 \times 10^{-8}</math></b> |
| only left (10*)             | $2.49 \times 10^{-7}$                   | $1.24 \times 10^{-7}$                   | $6.92 \times 10^{-8}$                   | $3.08 \times 10^{-4}$                   | $1.29 \times 10^{-3}$                   | $-3.51 \times 10^{-6}$                   | $-1.36 \times 10^{-5}$                   | $4.14 \times 10^{-7}$                   |
| only right (10*)            | $1.61 \times 10^{-7}$                   | $7.02 \times 10^{-8}$                   | $1.79 \times 10^{-8}$                   | $2.04 \times 10^{-4}$                   | $8.60 \times 10^{-4}$                   | $-3.27 \times 10^{-6}$                   | $-1.17 \times 10^{-5}$                   | $1.62 \times 10^{-7}$                   |
| <b>left and right (20*)</b> | <b><math>4.14 \times 10^{-7}</math></b> | <b><math>2.07 \times 10^{-7}</math></b> | <b><math>1.12 \times 10^{-7}</math></b> | <b><math>5.18 \times 10^{-4}</math></b> | <b><math>2.19 \times 10^{-3}</math></b> | <b><math>-5.81 \times 10^{-6}</math></b> | <b><math>-2.10 \times 10^{-5}</math></b> | <b><math>5.10 \times 10^{-7}</math></b> |
| odd (20*)                   | $4.16 \times 10^{-7}$                   | $2.04 \times 10^{-7}$                   | $1.15 \times 10^{-7}$                   | $5.24 \times 10^{-4}$                   | $2.21 \times 10^{-3}$                   | $-5.73 \times 10^{-6}$                   | $-1.80 \times 10^{-5}$                   | $4.02 \times 10^{-7}$                   |
| even (20*)                  | $3.90 \times 10^{-7}$                   | $1.88 \times 10^{-7}$                   | $7.56 \times 10^{-8}$                   | $4.98 \times 10^{-4}$                   | $2.10 \times 10^{-3}$                   | $-5.25 \times 10^{-6}$                   | $-1.65 \times 10^{-5}$                   | $1.23 \times 10^{-7}$                   |

\* represents the number of lights.

**Table S4.** Stability of temperature and RH control in this chamber system

| RH_set [%] | Temp._set [°C] | Temp. [°C]      | RH [%]         |
|------------|----------------|-----------------|----------------|
| 80         | 10             | 10.04 ± 0.05 °C | 82.76 ± 0.46 % |
| 80         | 20             | 20.00 ± 0.09 °C | 81.25 ± 0.39 % |
| 80         | 30             | 30.14 ± 0.15 °C | 81.50 ± 0.74 % |

**Table S5.** Comparison of the temperature control accuracy of this chamber system with that in other chamber studies

| Parameters               | Temp. Range [°C] | Temp. Accuracy [°C] | Volume [m <sup>3</sup> ] |
|--------------------------|------------------|---------------------|--------------------------|
| <b>This Study</b>        | <b>2.5 ~ 31</b>  | <b>≤ ± 0.15</b>     | <b>2</b>                 |
| (Wang et al., 2014)      | -10 ~ 40         | ± 1                 | 30                       |
| (Wu et al., 2007)        | /                | ± 0.2               | 2                        |
| (Bin Babar et al., 2016) | 18 ~ 33          | ± 0.5               | 7                        |
| (Ma et al., 2022)        | 15 ~ 30          | ± 1                 | 10                       |
| (Wang et al., 2015)      | -10 ~ 40         | ± 0.5               | 5                        |

**Table S6.** Comparison of wall loss rate constants of common gaseous pollutants in this study with that in other chambers

| Species                        | RH<5%      | RH>80%     | Wall Loss Rate Constant ( $10^{-4} \text{ min}^{-1}$ )_dry<br>[Volume (Reference)]                                                                             |
|--------------------------------|------------|------------|----------------------------------------------------------------------------------------------------------------------------------------------------------------|
| <b>NO<sub>2</sub>_Fans Off</b> | 1.98±0.74  | /          | 0.42 [2m <sup>3</sup> Teflon; (Wu et al., 2007)];<br>4~20 [5m <sup>3</sup> Teflon; (Wang et al., 2015)];<br>1.6 [3m <sup>3</sup> Teflon; (Li et al., 2017)];   |
| <b>NO<sub>2</sub></b>          | 1.76±0.41  | 5.21±0.52  |                                                                                                                                                                |
| <b>SO<sub>2</sub>_Fans Off</b> | 2.24±0.91  | /          |                                                                                                                                                                |
| <b>SO<sub>2</sub></b>          | 9.32±1.81  | /          |                                                                                                                                                                |
| <b>NO_Fans Off</b>             | 3.55±1.32  | /          | 0.38 [2m <sup>3</sup> Teflon; (Wu et al., 2007)];<br>3.0~3.1 [5m <sup>3</sup> Teflon; (Wang et al., 2015)];                                                    |
| <b>NO</b>                      | 10.40±1.67 | 11.65±1.68 |                                                                                                                                                                |
| <b>CO_Fans Off</b>             | 1.97±1.55  | /          |                                                                                                                                                                |
| <b>CO</b>                      | 5.10±1.58  | 8.05±1.72  |                                                                                                                                                                |
| <b>O<sub>3</sub>_Fans Off</b>  | 2.48±1.55  | /          | 6.1 [2m <sup>3</sup> Teflon; (Wu et al., 2007)];<br>3.3 [2m <sup>3</sup> Teflon; (Bernard et al., 2016)];<br>8.99 [3m <sup>3</sup> Teflon; (Li et al., 2017)]; |
| <b>O<sub>3</sub></b>           | 3.39±0.48  | 7.68±0.68  |                                                                                                                                                                |

**Table S7.** Total particle volume wall loss rate constants under different RHs in this study

| RH [%] | Temp. [°C] | Total volume wall loss constant [ $10^{-3} \text{ min}^{-1}$ ] |
|--------|------------|----------------------------------------------------------------|
| < 5    | 20±0.1     | 4.96±0.57                                                      |
| 30     | 20±0.1     | 5.05±0.11                                                      |
| 60     | 20±0.1     | 4.97±0.71                                                      |
| 90     | 20±0.1     | 3.71±0.34                                                      |

**Table S8.** Summary of experimental conditions and results for  $\alpha$ -pinene ozonolysis experiments

| Exp | Exp Condition    | RH [%] | Temp. [K]  | Initial VOC<br>[ppb] | Initial O3<br>[ppb] | $\Delta m_0$<br>[ $\mu\text{g}/\text{m}^3$ ] | SOA Yield |
|-----|------------------|--------|------------|----------------------|---------------------|----------------------------------------------|-----------|
| 1   | No Seeds         | <5     | 293.15±0.1 | 61.17                | 248                 | 137.69                                       | 0.406     |
| 2   | No Seeds         | <5     | 293.15±0.1 | 31.5                 | 414                 | 7.939                                        | 0.045     |
| 3   | No Seeds         | <5     | 293.15±0.1 | 41.6693              | 255                 | 75.046                                       | 0.327     |
| 4   | No Seeds         | <5     | 293.15±0.1 | 41.275               | 152.7               | 60.57                                        | 0.276     |
| 5   | No Seeds         | <5     | 293.15±0.1 | 73.861               | 73.4                | 64.958                                       | 0.289     |
| 6   | Solid Seeds      | <5     | 293.15±0.1 | 61.635               | 324                 | 112.782                                      | 0.329     |
| 7   | Metastable Seeds | ~60    | 293.15±0.1 | 68.8524              | 298                 | 83.769                                       | 0.262     |
| 8   | Liquid Seeds     | ~80    | 293.15±0.1 | 70.2095              | 309                 | 84.215                                       | 0.216     |

**Table S9.** Comparison of the fitting parameters of SOA two-product model for seed-absent experiments in this study with that in other chamber studies

| $\alpha_1$ | $\alpha_2$ | K1        | K2        | Reference                                                  |
|------------|------------|-----------|-----------|------------------------------------------------------------|
| 0.62479    | 0.0326791  | 0.0121589 | 0.0121596 | This Study                                                 |
| 0.4626     | 0.04287    | 0.0134    | 0.01124   | (Ma et al., 2022)                                          |
| 0.200563   | 0.13575    | 1.0024    | 0.001     | (Bin Babar et al., 2016)<br><i>(Fitting in this study)</i> |
| 0.189      | 0.486      | 0.0958    | 0.0022    | (Wang et al., 2014)                                        |
| 0.11       | 0.29       | 0.40      | 0.004     | (Wang et al., 2011)                                        |
| 0.239      | 0.169      | 0.042     | 0.001     | (Cocker Iii et al., 2001)                                  |



## 2 m<sup>3</sup> Teflon Reactor

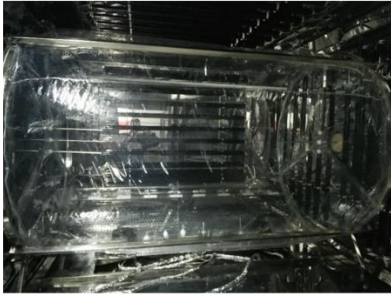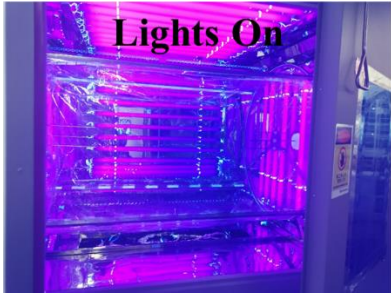

## Enclosure

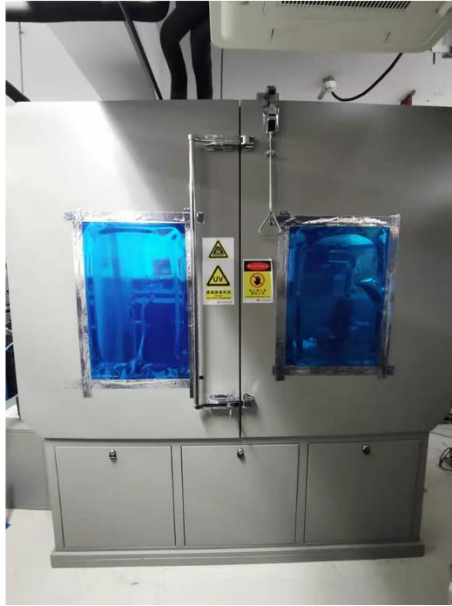

Figure S1. Pictures of this AIR Teflon chamber (reactor and its enclosure)

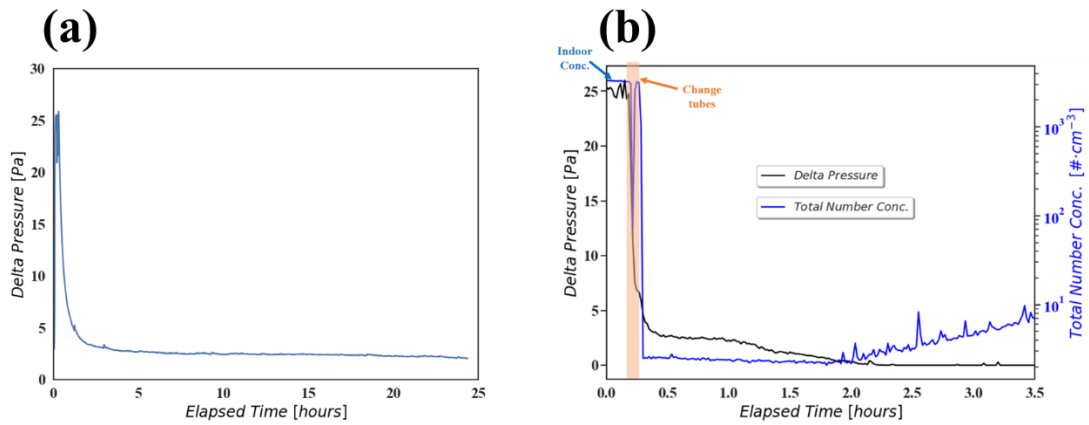

Figure S2. Description of leakproofness for the reactor

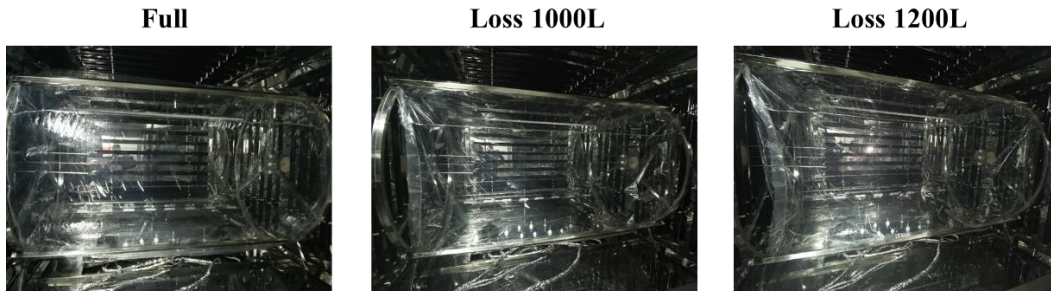

**Figure S3.** Pictures of the shrunk volumes with the amount of gas lost

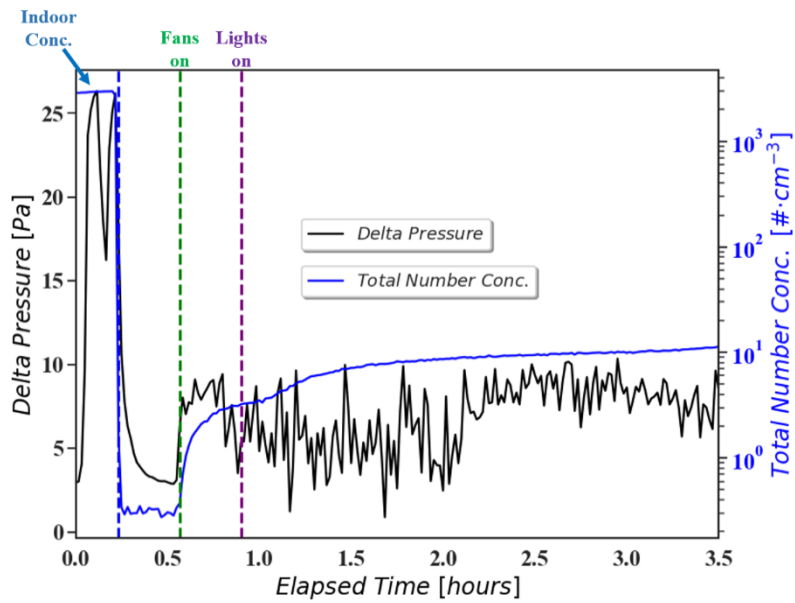

**Figure S4.** Interference test of lights and fans working on the background particle number concentration

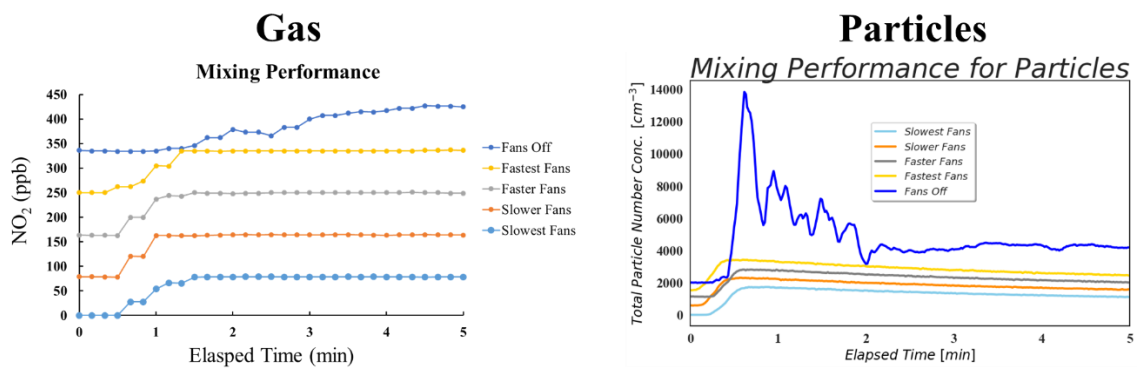

**Figure S5.** Mixing performance of gases and particles

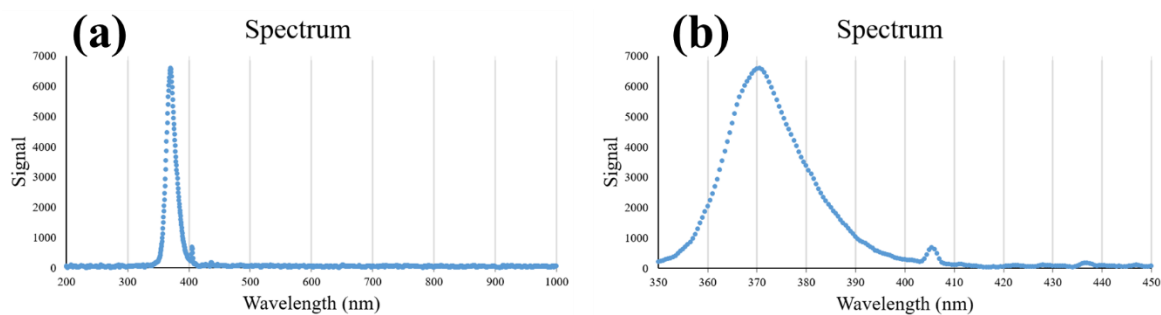

**Figure S6.** Radiation spectral distribution characteristics of the current artificial lights

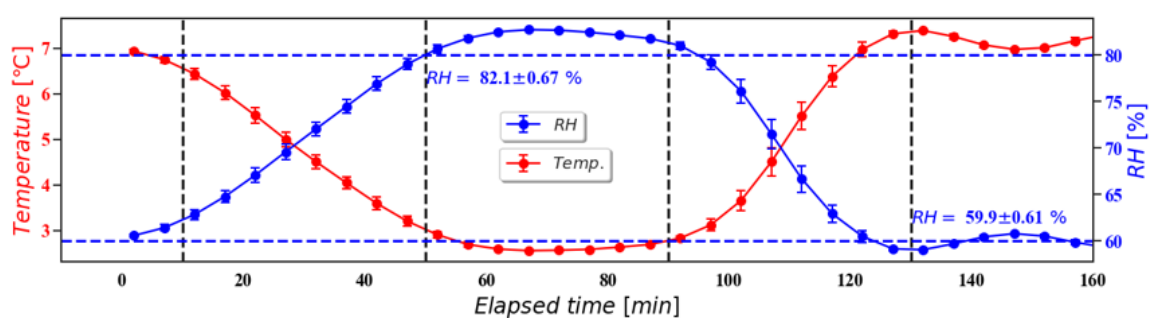

**Figure S7.** Control performance for RH cycle change in this chamber system

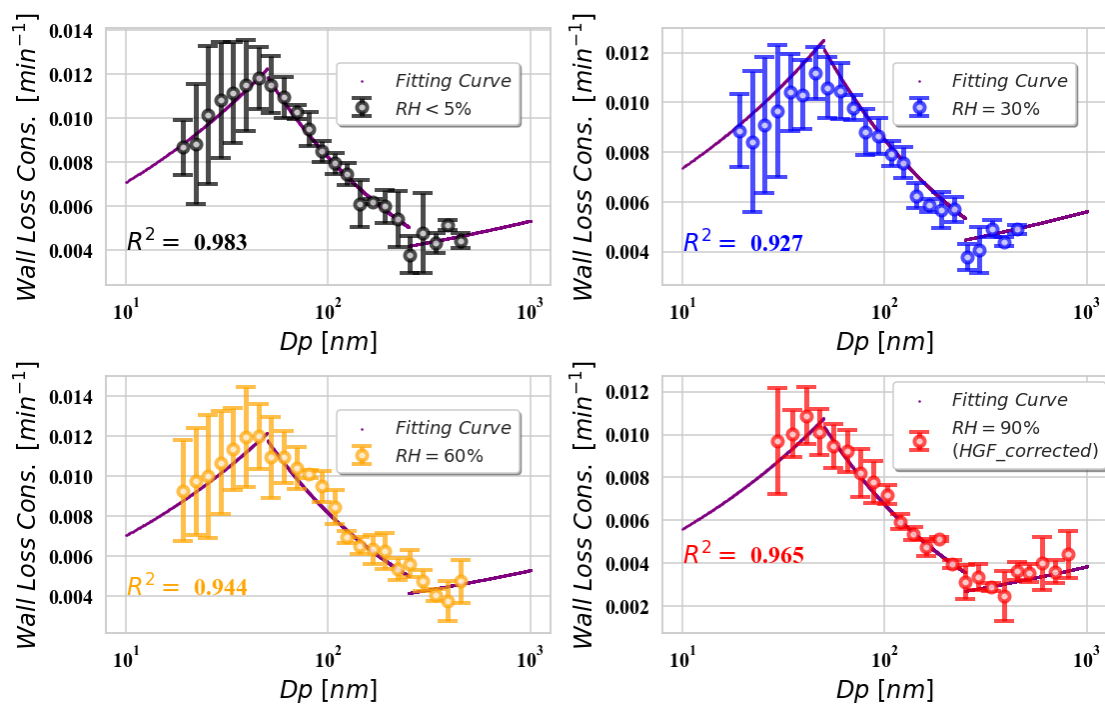

**Figure S8.** Wall loss rate constants of ammonium sulfates particles under different RH as a function of particle size

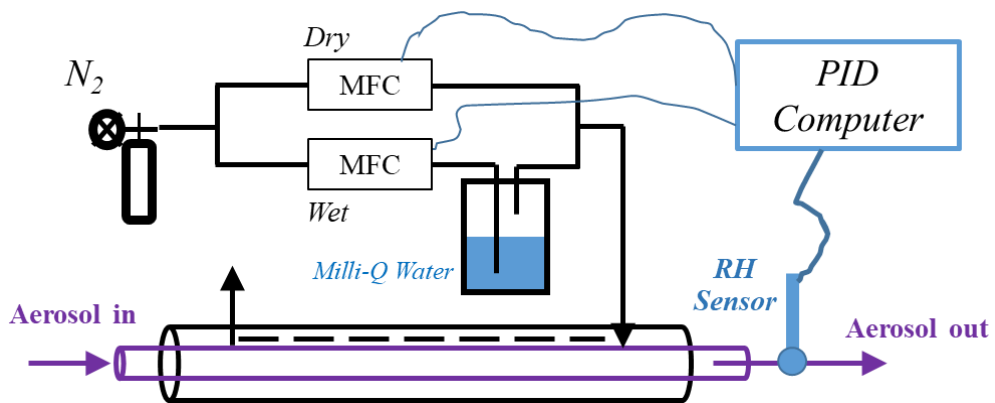

**Figure S9.** Diagram of the pre-RH-control device for seed particles

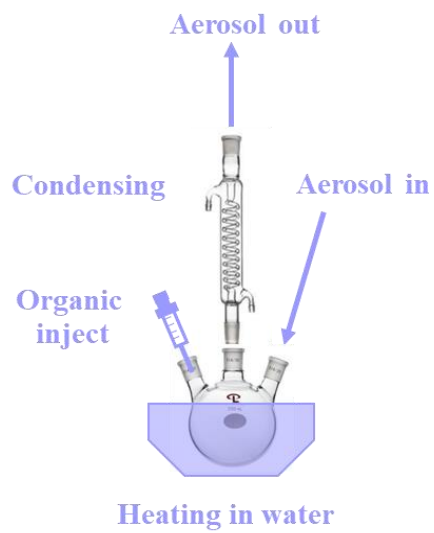

**Figure S10.** Diagram of the coating device for seed particles

20220329

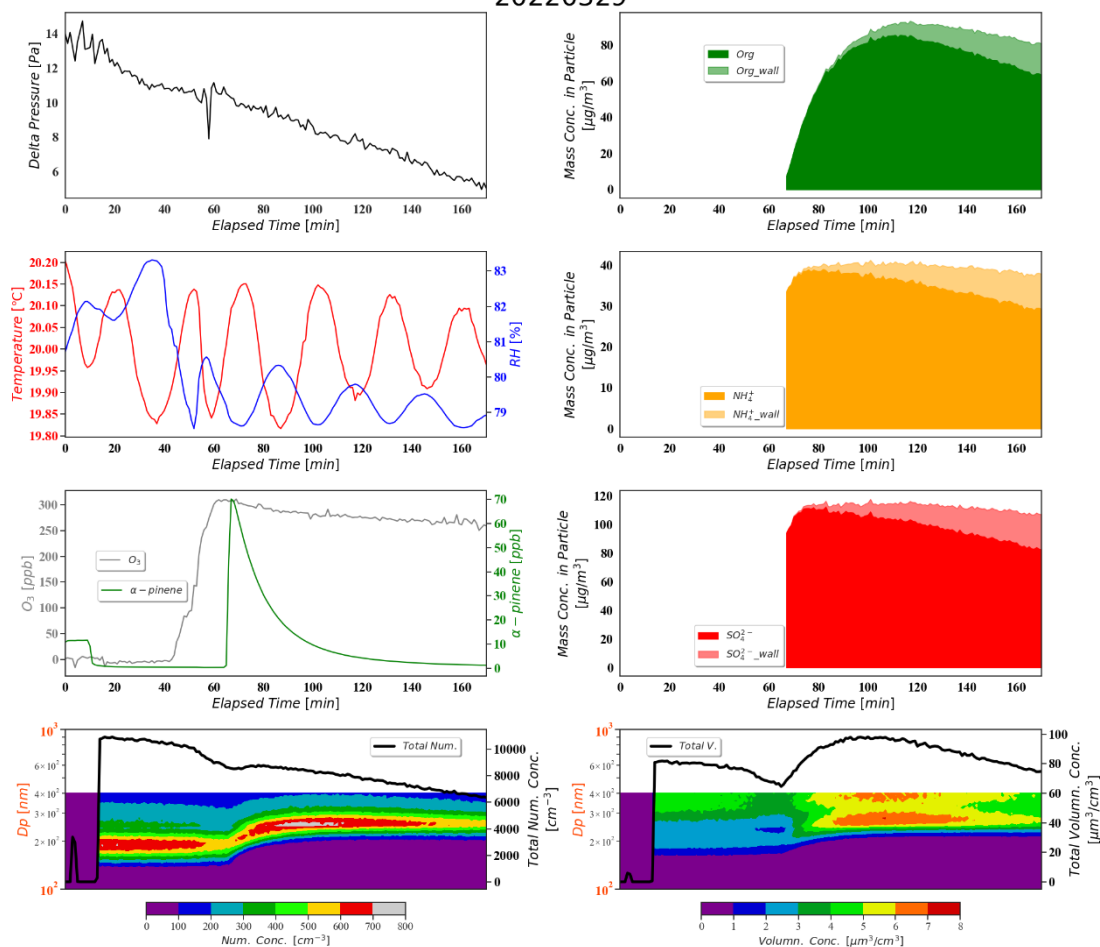

**Figure S11.** Example data from an  $\alpha$ -pinene ozonolysis experiment (deliquescent ammonium sulfate seeds, 80% RH)

## References

- Bernard, F., Ciuraru, R., Boreave, A., and George, C.: Photosensitized Formation of Secondary Organic Aerosols above the Air/Water Interface, *Environmental Science & Technology*, 50, 8678-8686, 2016.
- Bin Babar, Z., Park, J. H., Kang, J., and Lim, H. J.: Characterization of a Smog Chamber for Studying Formation and Physicochemical Properties of Secondary Organic Aerosol, *Aerosol Air Qual Res*, 16, 3102-3113, 2016.
- Carter, W. P. L., Cocker, D. R., Fitz, D. R., Malkina, I. L., Bumiller, K., Sauer, C. G., Pisano, J. T., Bufalino, C., and Song, C.: A new environmental chamber for evaluation of gas-phase chemical mechanisms and secondary aerosol formation, *Atmospheric Environment*, 39, 7768-7788, 2005.
- Chen, T. Z., Liu, Y. C., Ma, Q. X., Chu, B. W., Zhang, P., Liu, C. G., Liu, J., and He, H.: Significant source of secondary aerosol: formation from gasoline evaporative emissions in the presence of SO<sub>2</sub> and NH<sub>3</sub>, *Atmospheric Chemistry And Physics*, 19, 8063-8081, 2019.
- Cocker III, D. R., Clegg, S. L., Flagan, R. C., and Seinfeld, J. H.: The effect of water on gas-particle

partitioning of secondary organic aerosol. Part I:  $\alpha$ -pinene/ozone system, *Atmospheric Environment*, 35, 6049-6072, [https://doi.org/10.1016/S1352-2310\(01\)00404-6](https://doi.org/10.1016/S1352-2310(01)00404-6), 2001.

Li, K. W., Chen, L. H., Han, K., Lv, B. A., Bao, K. J., Wu, X. C., Gao, X., and Cen, K. F.: Smog chamber study on aging of combustion soot in isoprene/SO<sub>2</sub>/NO<sub>x</sub> system: Changes of mass, size, effective density, morphology and mixing state, *Atmospheric Research*, 184, 139-148, 2017.

Ma, W., Liu, Y., Zhang, Y., Feng, Z., Zhan, J., Hua, C., Ma, L., Guo, Y., Zhang, Y., Zhou, W., Yan, C., Chu, B., Chen, T., Ma, Q., Liu, C., Kulmala, M., Mu, Y., and He, H.: A New Type of Quartz Smog Chamber: Design and Characterization, *Environ Sci Technol*, 56, 2181-2190, [10.1021/acs.est.1c06341](https://doi.org/10.1021/acs.est.1c06341), 2022.

Platt, S. M., El Haddad, I., Zardini, A. A., Clairotte, M., Astorga, C., Wolf, R., Slowik, J. G., Temime-Roussel, B., Marchand, N., Jezek, I., Drinovec, L., Mocnik, G., Mohler, O., Richter, R., Barnet, P., Bianchi, F., Baltensperger, U., and Prevot, A. S. H.: Secondary organic aerosol formation from gasoline vehicle emissions in a new mobile environmental reaction chamber, *Atmospheric Chemistry And Physics*, 13, 9141-9158, 2013.

Wang, J., Doussin, J. F., Perrier, S., Perraudin, E., Katrib, Y., Pangu, E., and Picquet-Varrault, B.: Design of a new multi-phase experimental simulation chamber for atmospheric photo-smog, aerosol and cloud chemistry research, *Atmospheric Measurement Techniques*, 4, 2465-2494, 2011.

Wang, W. G., Li, K., Zhou, L., Ge, M. F., Hou, S. Q., Tong, S. R., Mu, Y. J., and Jia, L.: Evaluation and Application of Dual-Reactor Chamber for Studying Atmospheric Oxidation Processes and Mechanisms, *Acta Physico-Chimica Sinica*, 31, 1251-1259, 2015.

Wang, X., Liu, T., Bernard, F., Ding, X., Wen, S., Zhang, Y., Zhang, Z., He, Q., Lü, S., Chen, J., Saunders, S., and Yu, J.: Design and characterization of a smog chamber for studying gas-phase chemical mechanisms and aerosol formation, *Atmospheric Measurement Techniques*, 7, 301-313, [10.5194/amt-7-301-2014](https://doi.org/10.5194/amt-7-301-2014), 2014.

White, S., Angove, D., Li, K. W., Campbell, I., Element, A., Halliburton, B., Lavrencic, S., Cameron, D., Jamie, I., and Azzi, M.: Development of a new smog chamber for studying the impact of different UV lamps on SAPRC chemical mechanism predictions and aerosol formation, *Environmental Chemistry*, 15, 171-182, 2018.

Wu, S., Lu, Z. F., Hao, J. M., Zhao, Z., Li, J. H., Hideto, T., Hiroaki, M., and Akio, Y.: Construction and characterization of an atmospheric simulation smog chamber, *Adv Atmos Sci*, 24, 250-258, 2007.
